# Supplementary material for: Synergistic activation of mutant TERT promoter by Sp1 and GABPA in BRAFV600E-driven human cancers
Source: PubMed Central journal article supplement (PMC7822828; doi:10.1038/s41698-020-00140-5), 2021-01-22

## Supplementary Data

**Supplementary Table 1.** siRNA/shRNA sequences used in this study

| siRNAs/shRNAs | Sequence (5' – 3')     |
|---------------|------------------------|
| si-GABPA #1   | GCAGGGAUCUUAAGGACAATT  |
| si-GABPA #2   | GAGCCAACUUUCAUACAATT   |
| si-GABPA #3   | GCAGAUAGCUAUUAAUCCUTT  |
| si-GABPB1 #1  | GCAA AUGGAGCUCCCUUUATT |
| si-GABPB1 #2  | GCUGAUGUACACACGCAAATT  |
| si-GABPB1 #3  | GCUCCAUUGUCCAAUUCUUTT  |
| si-GABPB2 #1  | GGGAAAGAGGUUGCUAGAATT  |
| si-GABPB2 #2  | CCAAGGAAGCAAUGCAGAAUTT |
| si-GABPB2 #3  | CCCUCUGGGUAAUAUCCAATT  |
| si-HDAC1      | GGCUCCUAAAGUAACAUCATT  |
| si-Sp1 #1     | AAGCGCUUCAUGAGGAGUGTT  |
| si-Sp1 #2     | CCAACAGAUUAUCACAAAUTT  |
| si-Sp1 #3     | GCCAAUAGCUACUCAACUATT  |
| si-NC         | UUCUCCGAACGUGUCACGUTT  |
| sh-Sp1        | ACTCCTTCAGCCCTTATTA    |
| sh-NC         | CCTAAGGTAAAGTCGCCCTCG  |

**Supplementary Table 2.** qRT-PCR primers used in this study

| Genes             | Forward (5' – 3')      | Reverse (5' – 3')       |
|-------------------|------------------------|-------------------------|
| <i>β-actin</i>    | GCACAGAGCCTCGCCTT      | GTTGTCGACGACGAGCG       |
| <i>GABPA</i>      | TGGATACAGTGCAGCGGAGTTG | GCAGAGAAGCAGTAGCCAGAGC  |
| <i>GABPB1</i>     | CGGCACGAGCAGGTCAAGAT   | CAGCAGTACCTCTGTGGTGGAA  |
| <i>GABPB2</i>     | TGGTCATCCTCCAGGAAGCAAT | GCAGCCATACTCACAGGGTTCAG |
| <i>Sp1</i>        | CAATGGTAATGGTGGTGGTGC  | CCTGGGAGTTGTTGCTGTTCT   |
| <i>Sp1-3' UTR</i> | GGATGCAAGGTAGCATGGGT   | TCCCACCTTCAAAGAGGCAC    |

**Supplementary Table 3.** Antibodies used in this study

| <b>Antibody</b>            | <b>Source</b>             | <b>Catalogue Number</b> | <b>Dilution ratio (Western blot )</b> |
|----------------------------|---------------------------|-------------------------|---------------------------------------|
| anti-H3K9ac                | Abcam                     | ab10812                 | /                                     |
| anti-H3K27me3              | Cell Signaling Technology | #9733                   | /                                     |
| anti-GABPB1/2              | Santa Cruz                | sc-271571               | 1:500                                 |
| anti-GABPA                 | Santa Cruz                | sc-28312                | 1:500                                 |
| anti-total Sp1             | Cell Signaling Technology | #8535                   | 1:3000                                |
| anti-phosphor-Sp1 (Thr453) | Abcam                     | ab59257                 | 1:3000                                |
| anti-rabbit IgG            | Abcam                     | ab6715                  | /                                     |
| anti-mouse IgG             | Santa Cruz                | sc-2025                 | /                                     |
| anti-phospho-Erk1/2        | Cell Signaling Technology | #4370                   | 1:2000                                |
| anti-total Erk             | Bioworld Technology       | BS6426                  | 1:2000                                |
| anti-HDAC1                 | Abcam                     | ab7028                  | 1:2000                                |
| anti-TERT                  | Santa Cruz                | sc-377511               | 1:1000                                |
| anti-GAPDH                 | Abmart                    | M20006                  | 1:5000                                |

**Supplementary Table 4.** ChIP-qPCR primers for the *TERT* promoter

| <b>Target</b>           | <b>Position</b> | <b>Forward (5' – 3')</b> | <b>Reverse (5' – 3')</b> |
|-------------------------|-----------------|--------------------------|--------------------------|
| <i>TERT</i>             | -209/-47        | GCGCTGCCTGAAACTCGC       | CGTCCTGCCCCTTCACCT       |
| <i>Negative control</i> | -8504/-8384     | AACTACATGGTACTGGCATAA    | ATGTTCTTGGCACCTTTG       |

**Supplementary Table 5.** Mutagenesis primers for Thr739 of Sp1

| <b>Sequence (5' – 3')</b> |                                     |
|---------------------------|-------------------------------------|
| Forward                   | GGCAGTGGCACTGCCGCTCCTTCAGCCCTTATTAC |
| Reverse                   | GTAATAAGGGCTGAAGGAGCGGCAGTGCCACTGCC |

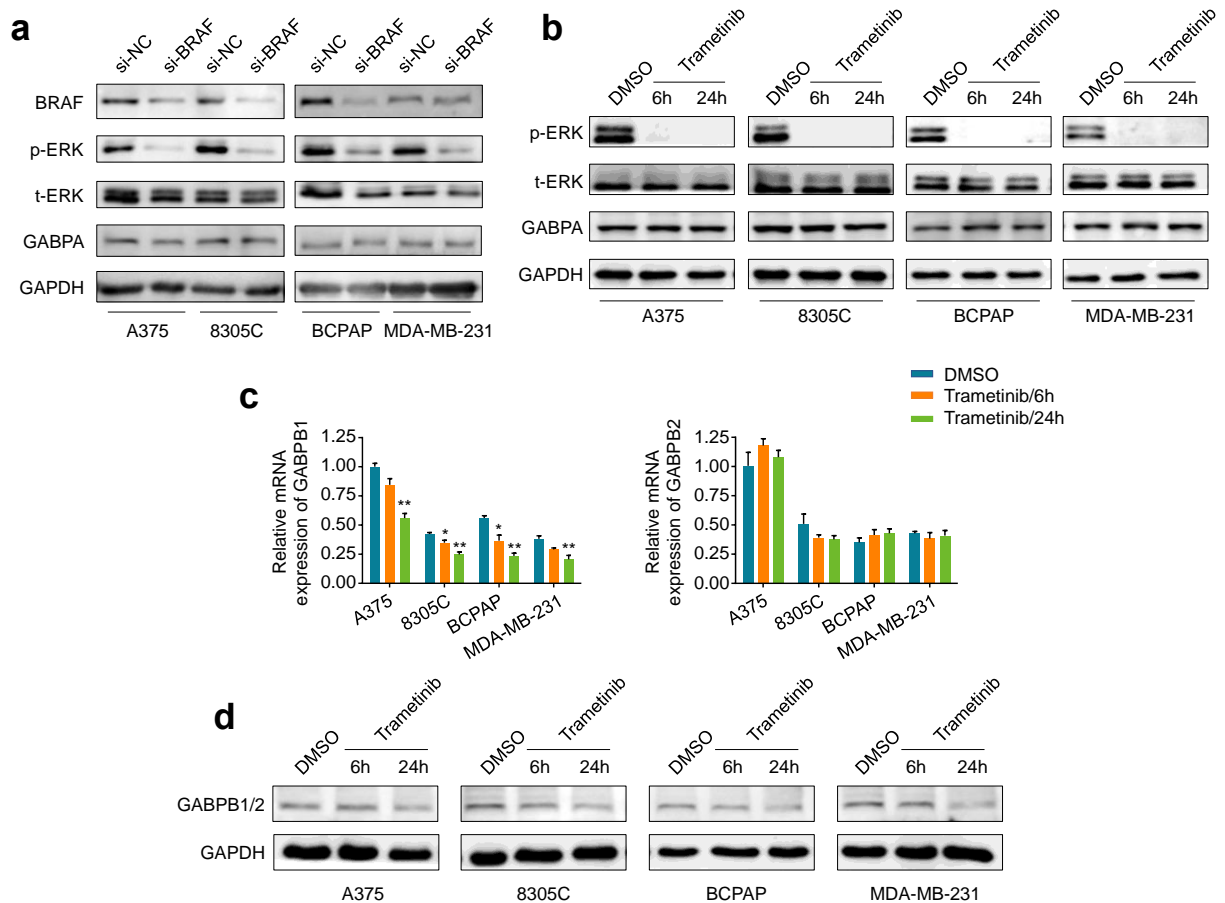

**Supplementary Figure 1. The effect of the blockade of ERK signaling on the expression of GABPA or GABPB1/2.** **a** Western blot analysis was performed to detect the expression of p-ERK, t-ERK and GABPA in A375, 8305C, BCPAP and MDA-MB-231 cells transfected with the indicated siRNAs. **b** The indicated cells were treated with DMSO or 100 nM trametinib for 6 h and 24 h, respectively, and western blot analysis was then performed to detect the expression of p-ERK, t-ERK and GABPA. The indicated cells were similarly treated with DMSO or 100 nM trametinib for 6 h and 24 h, respectively, and qRT-PCR (**c**) and western blot (**d**) assays were then performed to detect the expression of GABPB1/2. GAPDH was used as a loading control for western blot analysis. *18S* rRNA was used as a reference gene for qRT-PCR assay. Data were shown as mean  $\pm$  SD. \*,  $P < 0.05$ ; \*\*,  $P < 0.01$ .

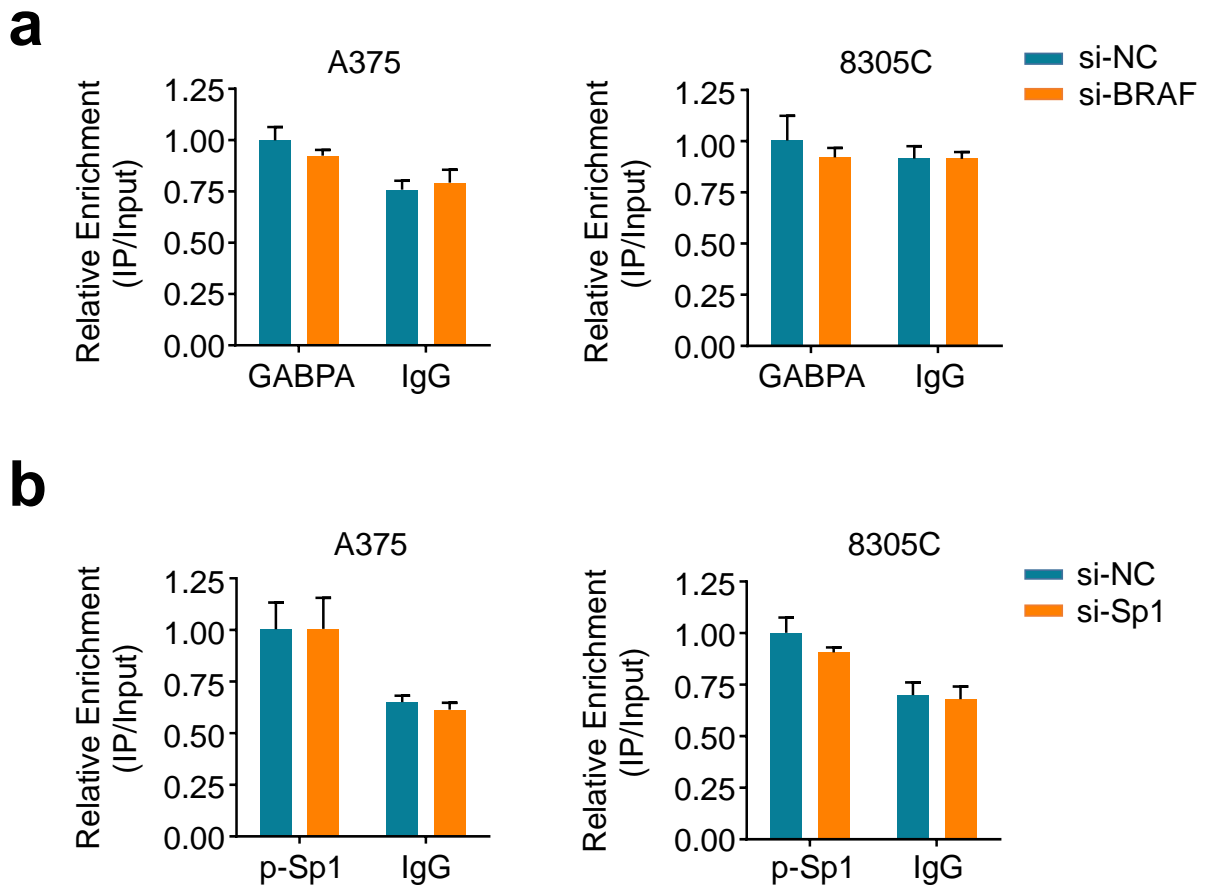

**Supplementary Figure 2.** The specificity of ChIP-qPCR assay was validated by determining the binding capacity of GABPA (**a**) and Sp1 (**b**) to the region lacking GABPA/Sp1 binding site.

Data were shown as mean  $\pm$  SD.

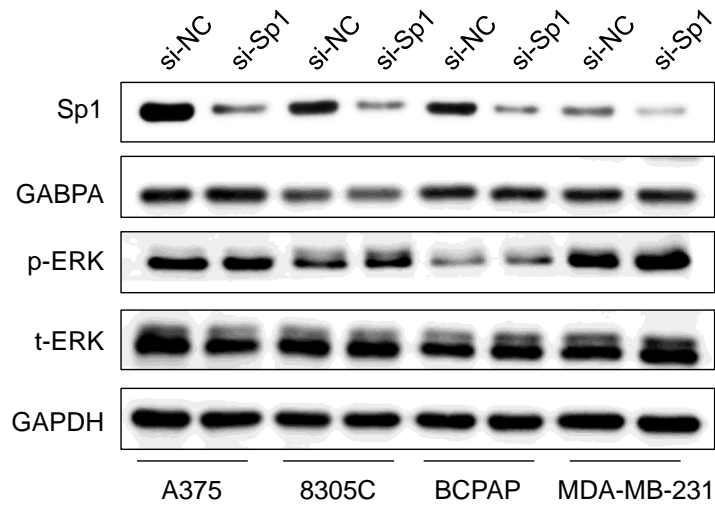

**Supplementary Figure 3.** Western blot analysis was performed to determine the effect of Sp1 knockdown on the levels of GABPA, p-ERK and t-ERK in the indicated cancer cells. GAPDH was used as a loading control.

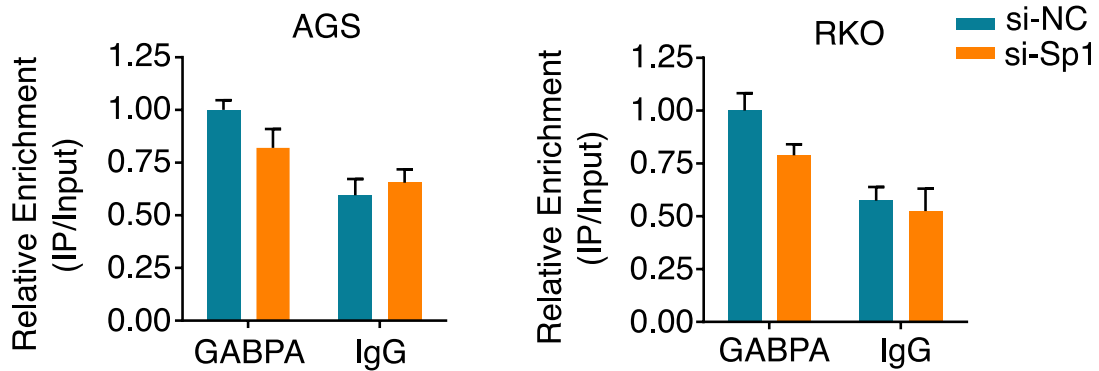

**Supplementary Figure 4.** ChIP-qPCR assay was performed to evaluate the effect of Sp1 knockdown on the binding of GABPA to *TERT* promoter in AGS and RKO cells. Data were shown as mean  $\pm$  SD.

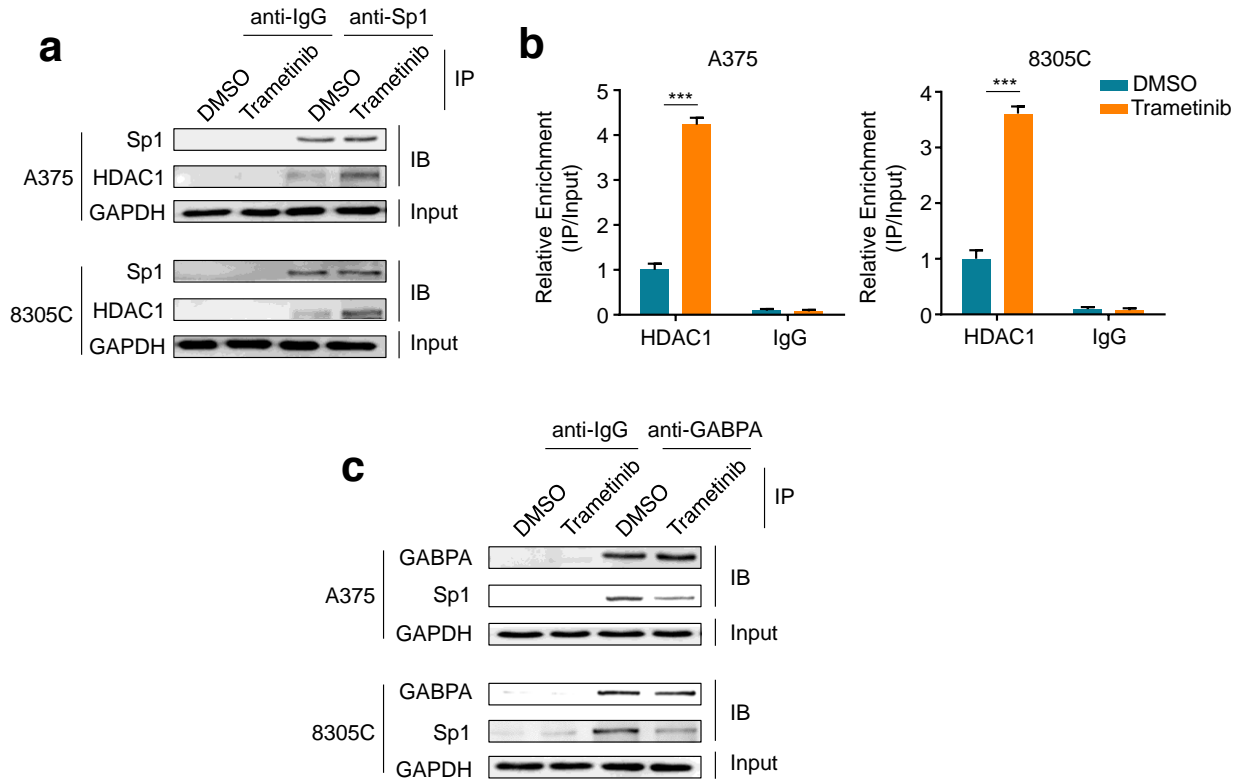

**Supplementary Figure 5. a** Co-IP assay of whole-cell lysates derived from the indicated cells treated with trametinib or DMSO to validate the interaction between Sp1 and HDAC1. **b** ChIP-qPCR assay was performed to evaluate the effect of trametinib treatment on the binding of HDAC1 to *TERT* promoter in the indicated cells. **c** Co-IP assay of whole-cell lysates derived from the indicated cells treated with trametinib or DMSO to validate the interaction between Sp1 and GABPA. Data were shown as mean  $\pm$  SD. \*\*\*,  $P < 0.001$ .

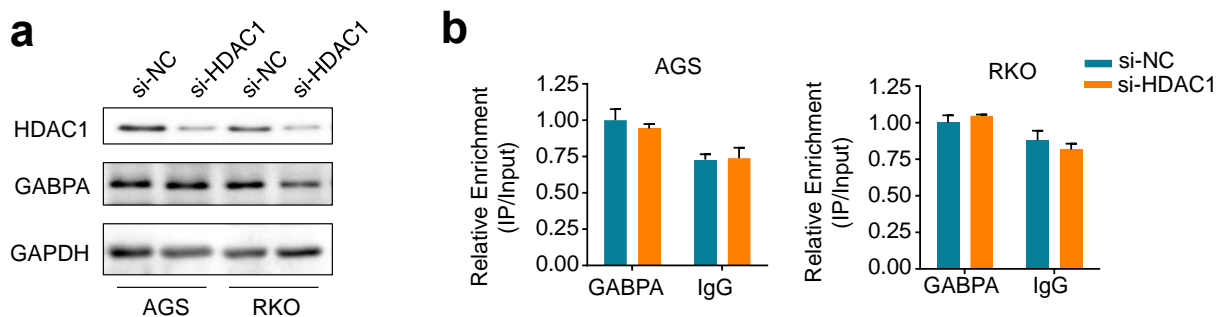

**Supplementary Figure 6.** **a** Western blot analysis was performed to determine the effect of HDAC1 knockdown on GABPA expression in AGS and RKO cells. GAPDH was used as a loading control. **b** ChIP-qPCR assay was performed to evaluate the effect of HDAC1 knockdown on the binding of GABPA to *TERT* promoter in AGS and RKO cells. Data were shown as mean  $\pm$  SD.

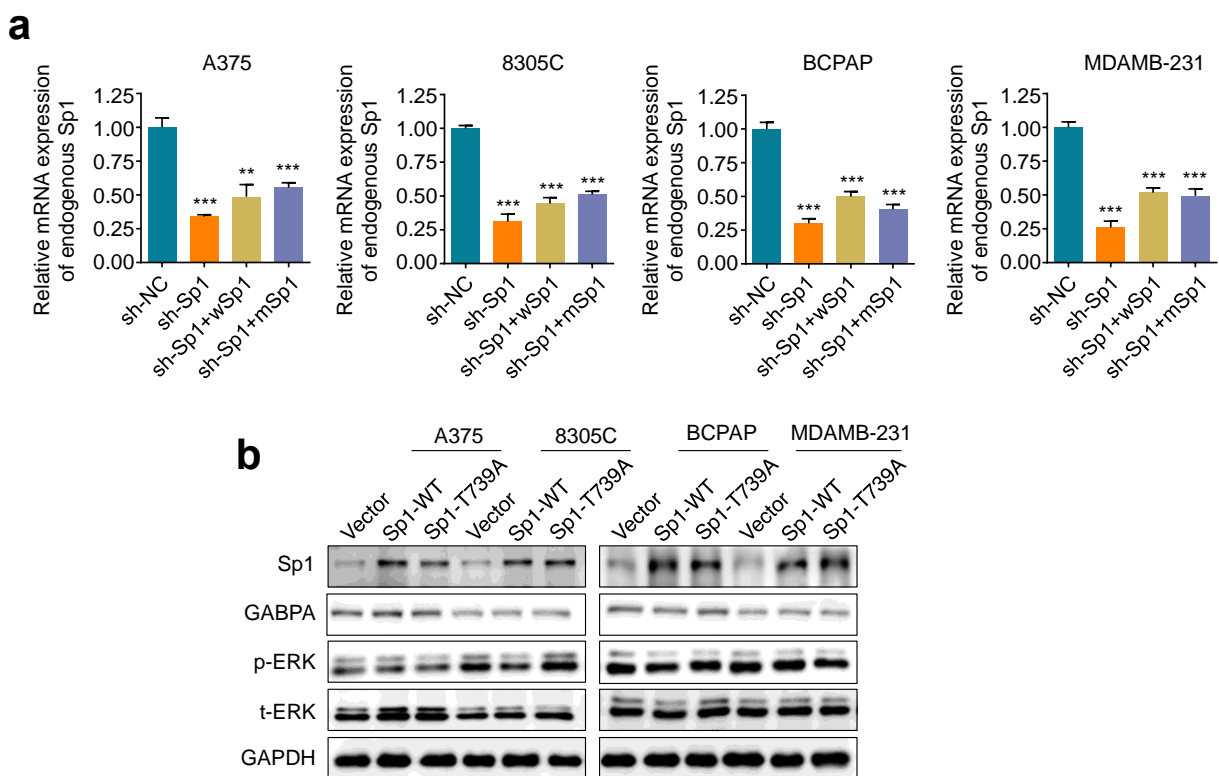

**Supplementary Figure 7.** The indicated cells were transfected with empty vector, wild-type (Sp1-WT) or mutant Sp1 (Sp1-T739A) expression construct. **a** qPCR assays with the primers targeting the 3'UTR of *Sp1* mRNA were performed to validate the expression of endogenous Sp1. **b** western blot analysis was then performed to detect the expression of Sp1, GABPA, p-ERK, t-ERK, and GAPDH.



ERK and t-ERK in the above cells. GAPDH was used as a loading control. \*\*,  $P < 0.01$ ; \*\*\*,  $P < 0.001$ .

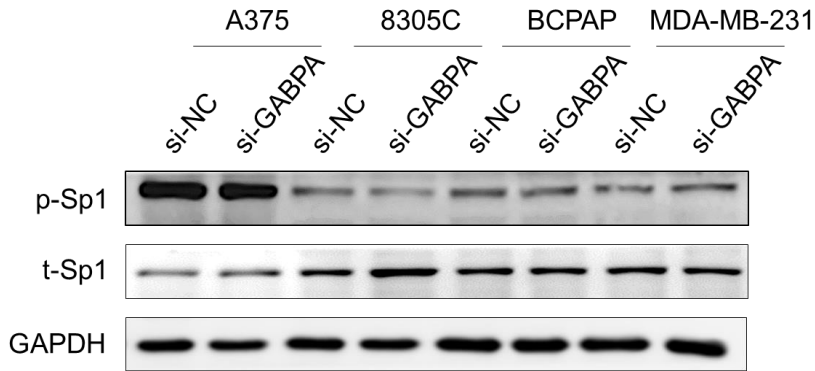

**Supplementary Figure 8.** Western blot analysis was performed to determine the effect of GABPA knockdown on the levels of phosphorylated Sp1 (p- Sp1) and total Sp1 (t- Sp1) in the indicated cancer cells. GAPDH was used as a loading control.

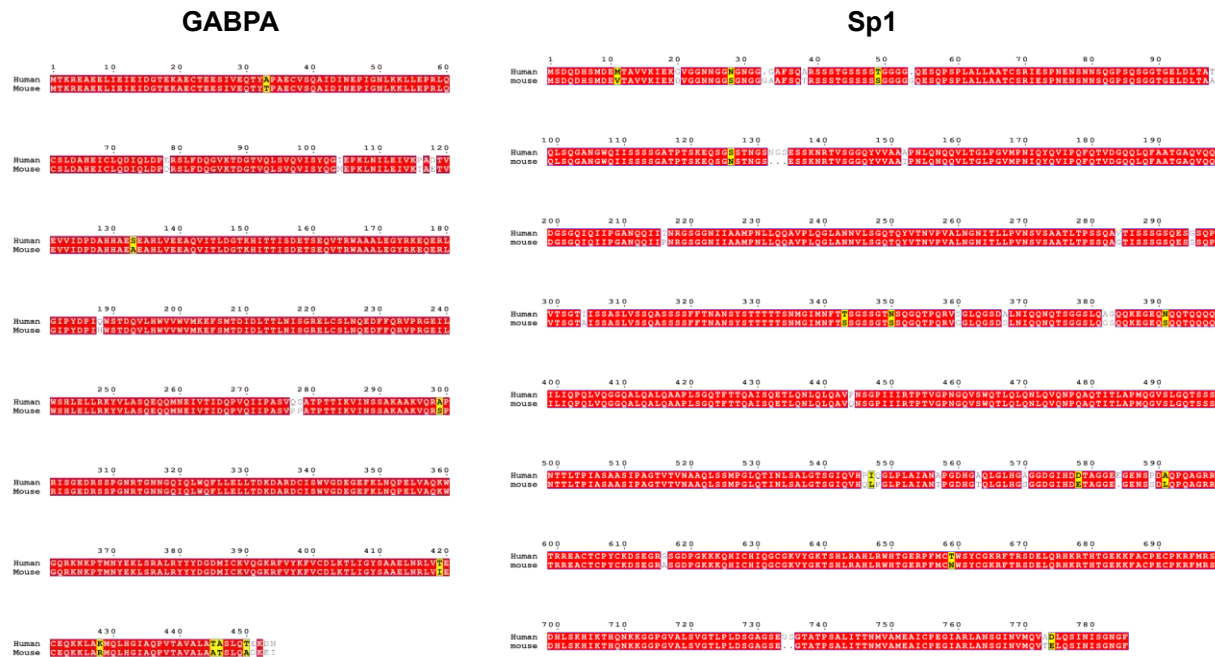

**Supplementary Figure 9.** Comparative analysis of amino acid sequences of GABPA and Sp1 between human and mouse.

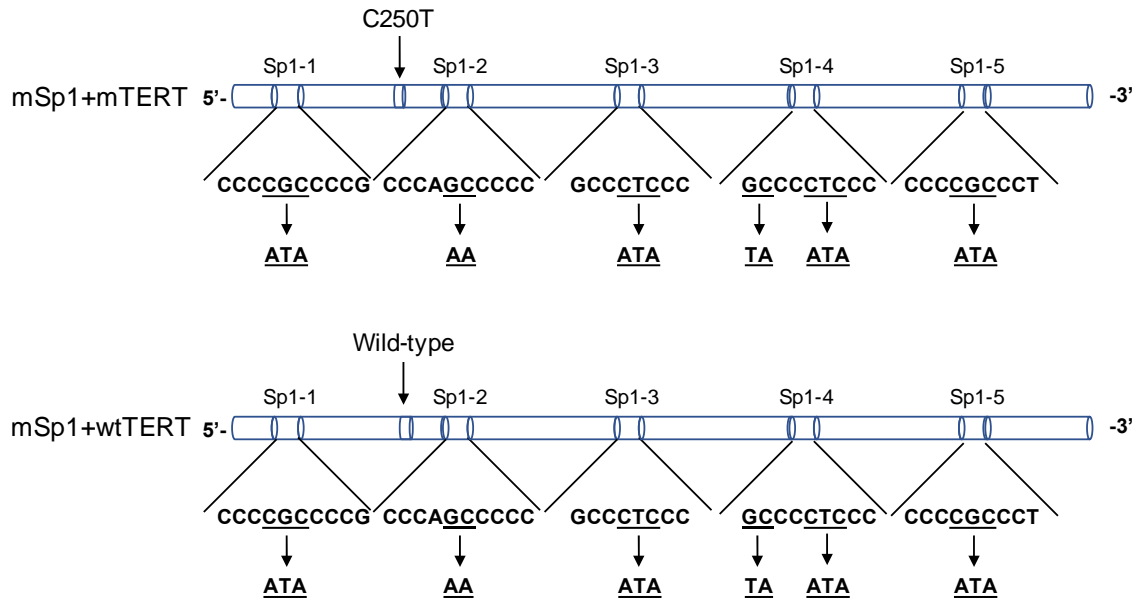

**Supplementary Figure 10.** A schematic model for mutations of Sp1 binding sites. mSp1, mutant Sp1 binding sites; mTERT, *TERT* promoter with C250T mutation; wtTERT, wild-type *TERT* promoter.

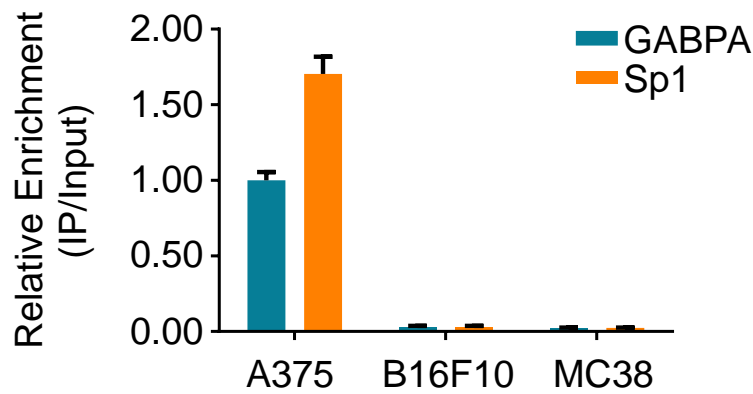

**Supplementary Figure 11.** Validation of the specificity of ChIP-qPCR assays for human *TERT* promoter in the indicated cells.

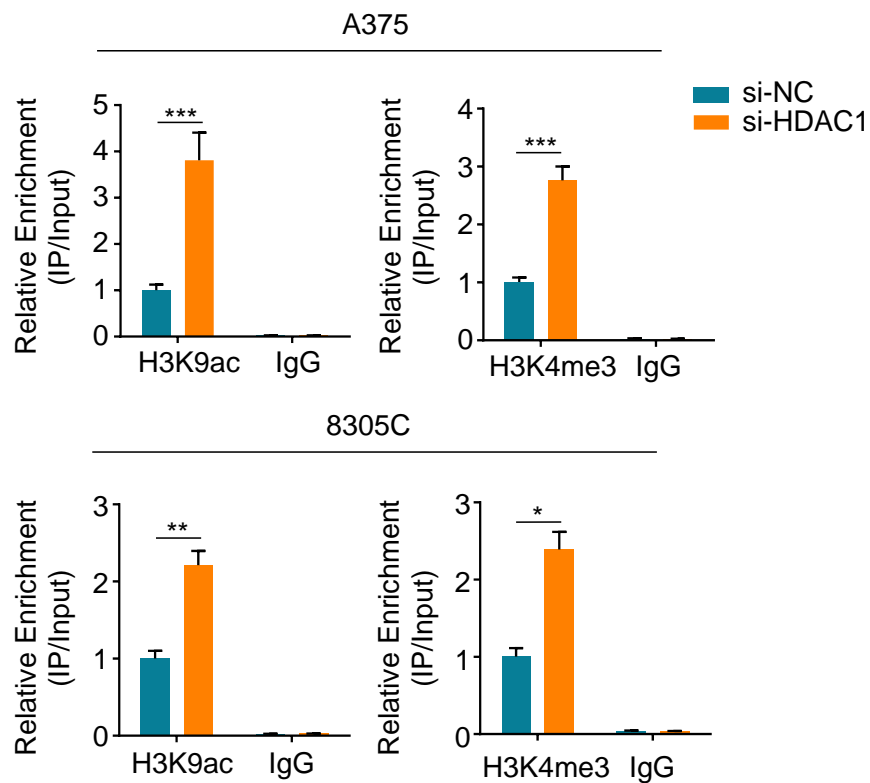

**Supplementary Figure 12.** ChIP-qPCR assay was performed to evaluate the effect of HDAC1 knockdown on histone modifications (including H3K9ac and H3K4me3) of *TERT* promoter in A375 and 8305C cells. Data were shown as mean  $\pm$  SD. \*,  $P < 0.05$ ; \*\*,  $P < 0.01$ ; \*\*\*,  $P < 0.001$ .

**Fig1.a**

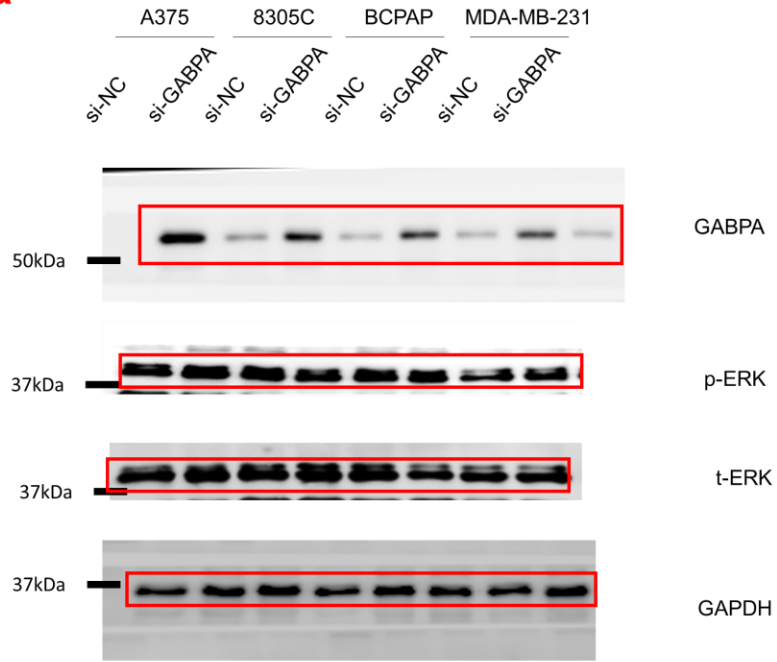

**Fig.1c**

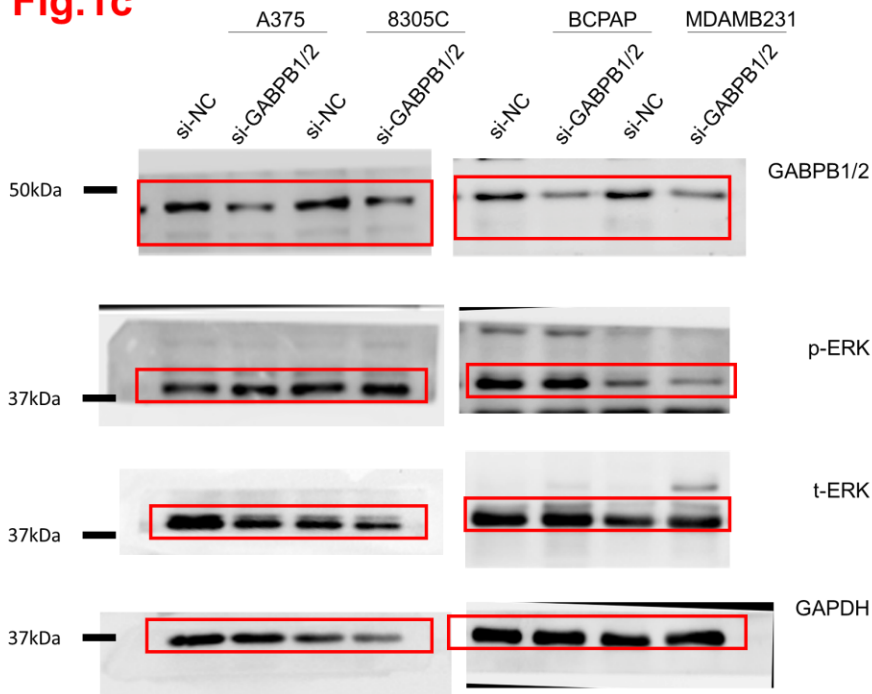

**Fig.1e**

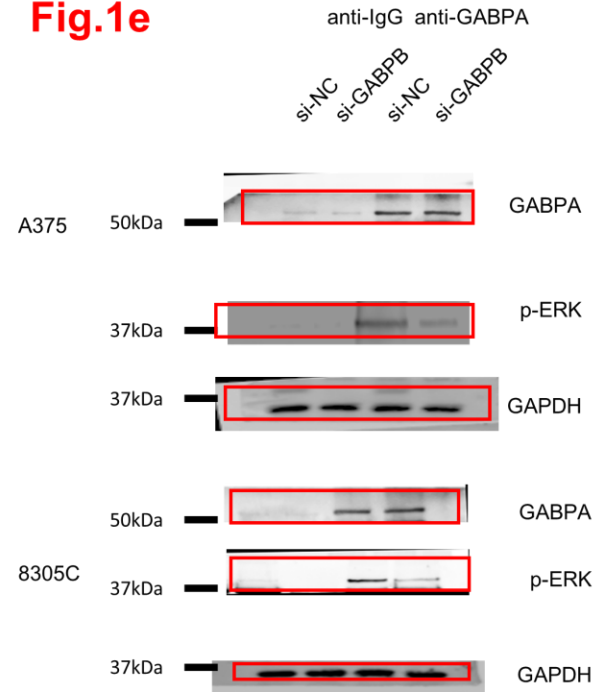

**Fig.2c**

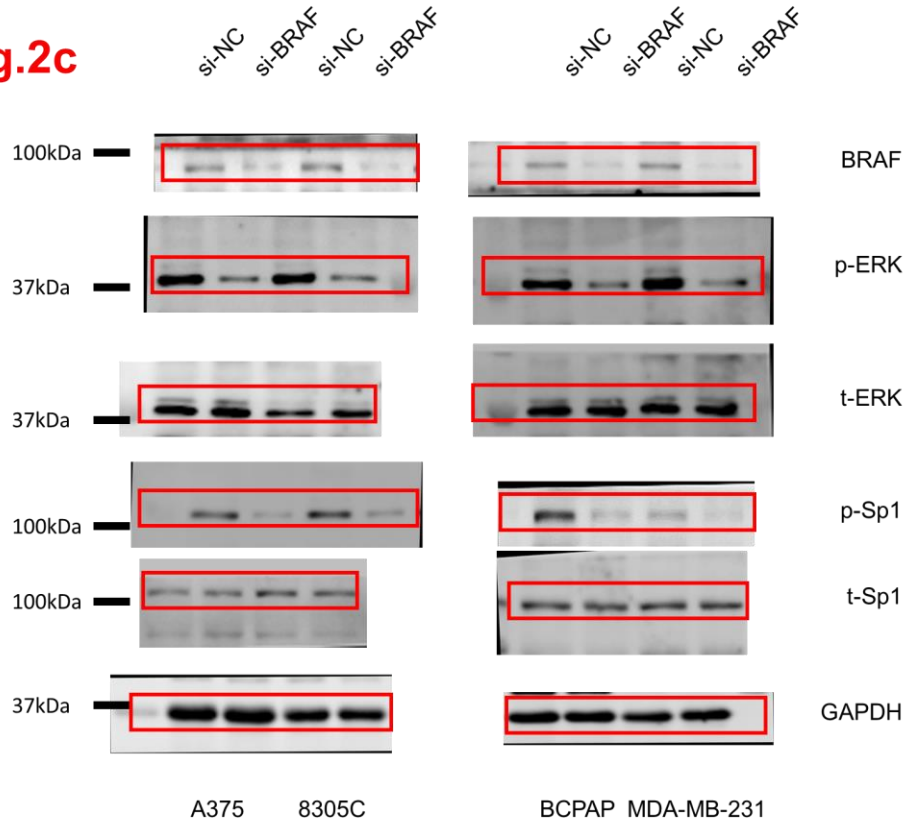

**Fig.2d**

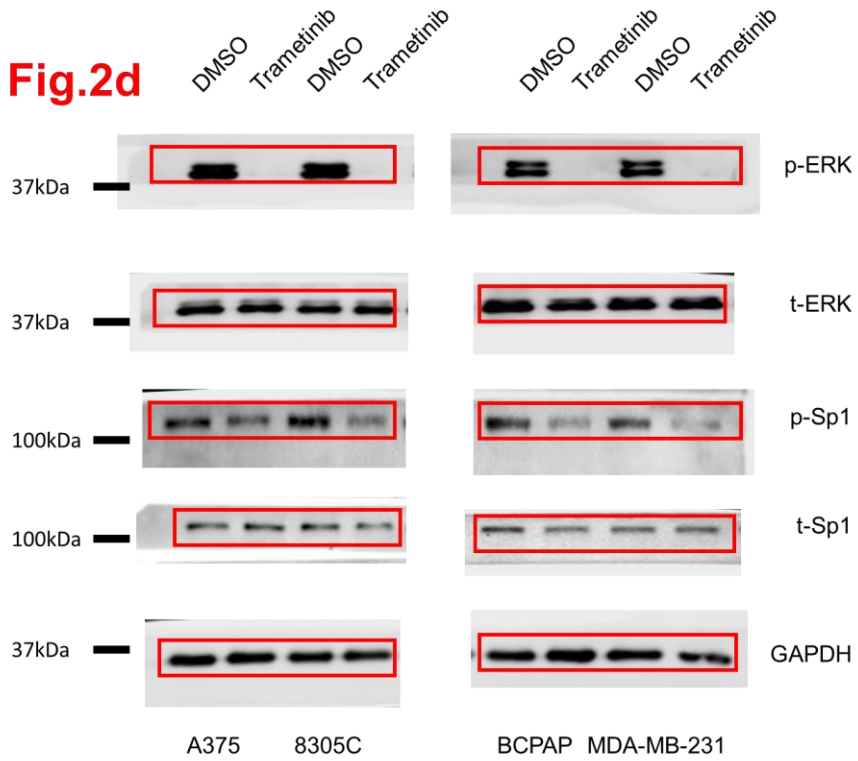

**Fig.3a**

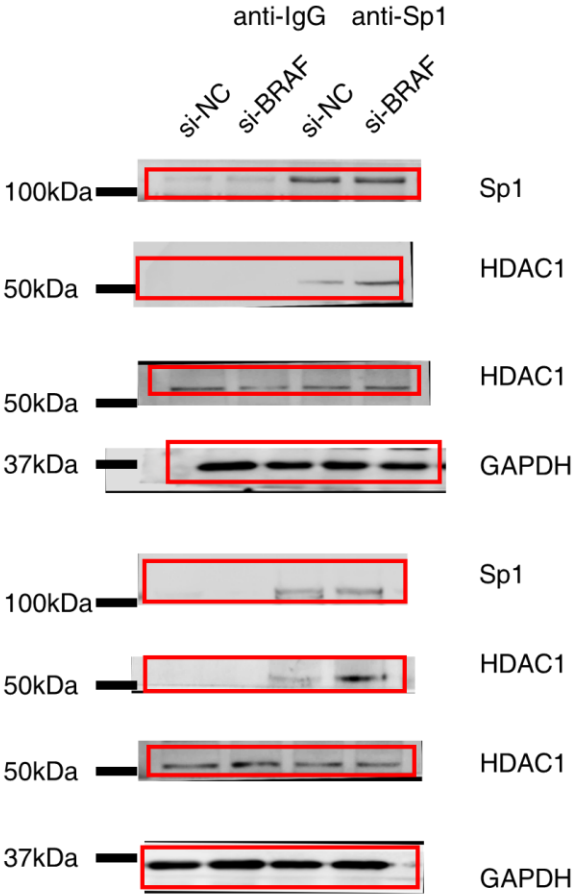

**Fig.3c**

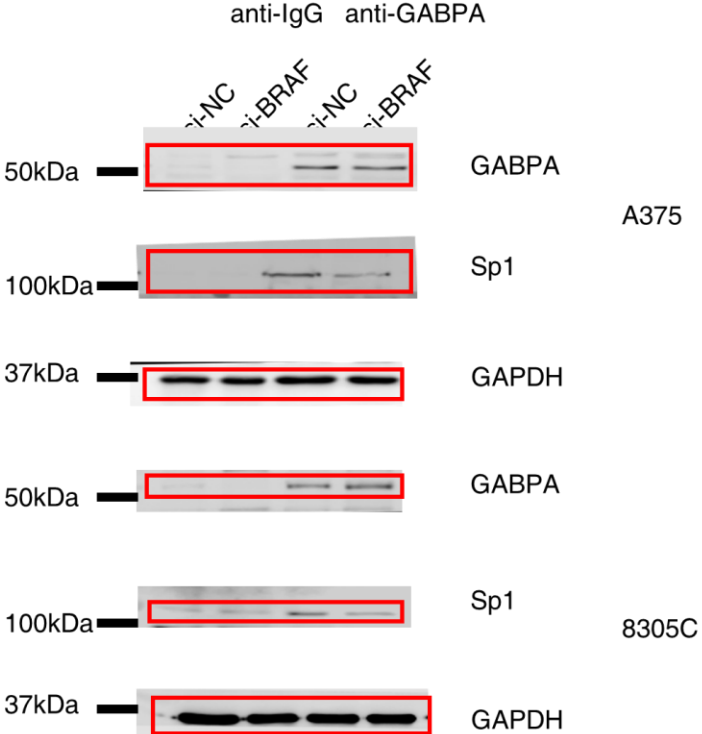

**Fig.3d**

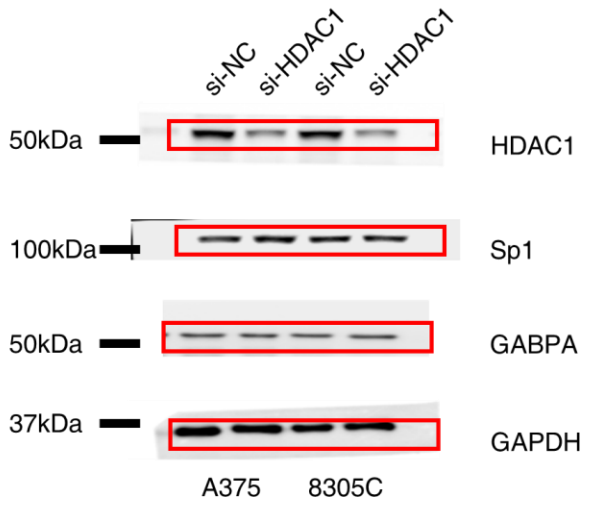

**Fig.3e**

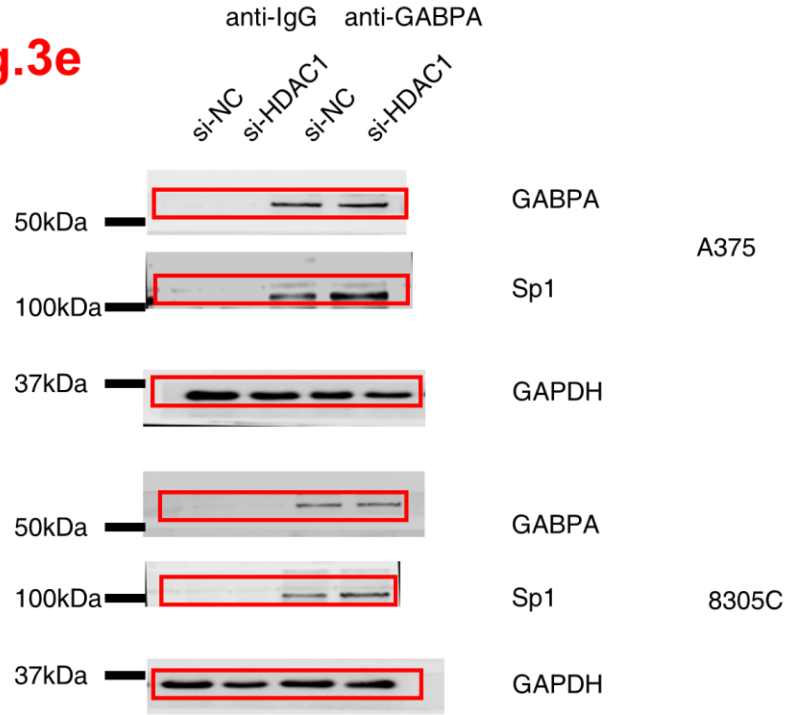

Supplement: 41698_2020_140_MOESM1_ESM.pdf [file 41698_2020_140_MOESM1_ESM.pdf]
